# Supplementary material for: Effectiveness of Single vs Multiple Doses of Prophylactic Intravenous Antibiotics in Implant-Based Breast Reconstruction: A Randomized Clinical Trial
Source: PubMed Central journal article supplement (PMC9482055; doi:10.1001/jamanetworkopen.2022.31583), 2022-09-16
Supplement: jamanetwopen-e2231583-s001.pdf [file jamanetwopen-e2231583-s001.pdf]

1 **Trial Protocol and Statistical Analysis Plan**

2  
3 The Use of Prophylactic Antibiotics in Implant-Based Immediate and Delayed Breast  
4 Reconstruction - A Prospective Randomized Trial.

5  
6 Eudra CT-number: 2012-004878-26  
7 Sponsor's protocol code number: 26842468452

8  
9 Sponsor: Jakob Lagergren, M.D., senior consultant/Ph.D., Department of Reconstructive  
10 Plastic Surgery, Karolinska University Hospital, Solna, 171 76 Stockholm. +468-517 796  
11 59, +4676-117 02 82.

12  
13 The Swedish Medical Products Agency approved testing with clinical drugs.

14  
15  
16 The Research Ethics Committee in Stockholm:

17  
18 Registration number: 2012/1032-31/1, update 2014/1158-32.

19  
20 Date of approval: 2012-07-11, update 2014-07-04.

21  
22  
23 **Research scientists**

24  
25 Jakob Lagergren, M.D./Senior Consultant/Ph.D., Department of Reconstructive Plastic  
26 Surgery, Karolinska University Hospital Solna, 171 76 Stockholm. +468-517 796 59,  
27 4676-117 02 82.

28  
29 Anna Ljung Konstantinidou, M.D./Consultant, Department of Breast and Endocrine  
30 Surgery, Karolinska University Hospital Solna, 171 76 Stockholm, +468-517 700 00,  
31 +4670-753 32 20.

32  
33 Kerstin Sandelin, M.D./Senior Consultant/Associate Professor, Department of Breast  
34 and Endocrine Surgery, Karolinska University Hospital Solna, 171 76 Stockholm. +468-  
35 517 718 76.

36  
37 Jessica Gahm, M.D./ Consultant /Ph.D., Department of Reconstructive Plastic Surgery,  
38 Karolinska University Hospital Solna, 171 76 Stockholm. +468-517 741 59.

39  
40 Martin Glimåker, M.D./Senior Consultant/Ph.D., Department of Infectious Diseases,  
41 Karolinska University Hospital, 171 76 Stockholm. +468-517 791 79.

42  
43  
44  
45  
46  
47 Trial protocol  
48 Version 4.0  
49 Date: 2014-11-25  
50 Status: FINAL

Antibiotics Trial Sponsor's Protocol Number: 26842468452

51 **Synopsis**

52

53 EudraCT-number: 2012-004878-26

54

55 Sponsor's protocol number: 26842468452

56

57 Sponsor: Jakob Lagergren, M.D./Senior Consultant/Ph:D., Department of Reconstructive  
58 Plastic Surgery, Karolinska University Hospital Solna, 171 76 Stockholm. +468-517 796  
59 59, +4676-117 02 82.

60

61 Title: The Use of Prophylactic Antibiotics in Implant-Based Immediate and Delayed  
62 Breast Reconstruction - A Prospective Randomized TrialTrial.

63

64 Background: Breast cancer is the most common form of cancer among women in  
65 industrialized countries and surgery is the primary treatment. Today, almost all breast  
66 cancer patients undergo surgery; nearly half of the patients undergo breast-conserving  
67 surgery and the remainder undergo mastectomy.

68

69 There are different methods of breast reconstruction after mastectomy. Reconstruction  
70 may be achieved with an implant (a prosthetic filled with silicon gel or saline) or  
71 autologous, the transfer of one's own body fat from, for example, the back or abdomen  
72 that is injected into the breast. Occasionally the methods are combined. Breast  
73 reconstruction may be performed directly after a mastectomy and is then referred to as  
74 immediate reconstruction, or as a second surgery at a later date referred to as delayed  
75 reconstruction. Prophylactic antibiotics are administered in connection to certain  
76 surgical procedures to help reduce the risk of a postoperative infection. There is  
77 scientific evidence showing that prophylactic antibiotics reduce the number of  
78 infections after, for example, colorectal surgery, vascular surgery, heart surgery,  
79 pacemaker implantation, bone fracture surgery, joint prosthetics and breast cancer  
80 surgery. There are no equivalent studies for the benefits of prophylactic antibiotics in  
81 connection with reconstructive breast surgery with (an) implant. A single dose of  
82 antibiotics can, if given in connection with most surgeries, be just as effective as several  
83 doses. In connection with other types of surgeries, for example orthopedic and heart  
84 surgery, administering several doses of intravenous prophylactic antibiotics is regular  
85 praxis. The effect of the number of prophylactic doses during reconstructive breast  
86 surgery with (an) implant is not evident. Here at Karolinska University Hospital Solna  
87 we currently administer perioperative prophylactic antibiotics during reconstructive  
88 breast surgery with (an) implant as a single dose of intravenous Cloxacillin.

89

90 **Objective:** The objective of this trial is to ascertain which regime with prophylactic  
91 antibiotics, single dose or multiple doses, is most effective with the intention of  
92 preventing complications due to infection and side effects in connection with  
93 reconstructive breast surgery with (an) implant. We would like to optimize the use of  
94 prophylactics and in this way reduce the number of postoperative infections, minimize  
95 side effects and the overall consumption of antibiotics.

96

97

98

99

100 **Method:** This trial is carried out as a national multicenter trial including five clinics for  
101 breast and plastic surgery in Stockholm, as well as a number of clinics for breast and  
102 plastic surgery throughout the rest of the country that also perform reconstructive  
103 breast surgery with (an) implant.

104  
105

106 *Trial population:* All women (over 18 years of age) planned to undergo immediate or  
107 delayed first-time reconstruction with an implant are offered participation in this trial.  
108 Exclusion criteria include the lack of being able to make a decision concerning oral and  
109 written information about the trial or an allergy to both trial drugs (Cloxacillin and  
110 Clindamycin).

111

112 *Trial Arms:* Participants are randomized to either of the two trial arms: A, prophylactic  
113 antibiotics given intravenously as a single preoperative dose at start of surgery. B,  
114 prophylactic antibiotics administered in multiple perioperative, intravenous doses on  
115 the day of surgery beginning preoperatively in connection to start of surgery. According  
116 to completed power calculations, at least 870 patients need to be included trial with at  
117 least 435 patients in each trial arm. Inclusion time is estimated to 3-4 years.

118

119 *Randomization:* Randomizing occurs according to the computer generated  
120 randomization list with block randomization (18 blocks with 50 patients per block).  
121 Numbered and sealed envelopes are then handed out to the participants in accordance  
122 with the randomization list.

123

124 *Clinical trial drugs:* First hand antibiotics are Cloxacillin and second hand antibiotics (in  
125 the case of penicillin allergy) are Clindamycin. In trial arm A, Cloxacillin is given in a  
126 dose of 2 g x 1 intravenously or Clindamycin in a dose of 600 mg x 1 intravenously. In  
127 trial arm B Cloxacillin is given in a dose of 2 g x 4 intravenously or Clindamycin in a dose  
128 of 600 mg x 3 intravenously, evenly spread out over 24 hours.

129

130

131 *Outcome Measurements:* This trial's outcome measurement is a postoperative infection  
132 in the reconstructed breast. In this trial, a postoperative infection is defined as the  
133 state/status of the patient that would incite the treating physician to prescribe  
134 treatment with antibiotics. The three degrees of infection that are registered are:  
135 Infection leading to the removal of an implant (primary endpoint), infection requiring  
136 intravenous treatment with antibiotics in hospital (secondary endpoint) and infection  
137 requiring treatment with oral antibiotics (secondary endpoint).

138

139 *Follow-up:* Follow-up is carried out 10 days (+/- 3 days), 1 month (+/- 7 days), 3 months  
140 (+/-7 days), 6 months (+/- 14 days) and 12 months (+/-14 days) after surgery. These  
141 follow-ups are performed by a clinical trials-nurse who collects patient information via  
142 patient records and interviews over the telephone.

143

144 *Handling of data and patient confidentiality:* Patient information will be collected in a  
145 CRF (Case Report Form) containing patient information such as which type of breast  
146 surgery the patient has undergone, if the patient has received chemotherapy and/or  
147 radiotherapy, weight, height and BMI as well as information on side effects,  
148 postoperative infections, extra doctor's visits or sick leave due to infection. All patient

149 information from this trial will be saved in a data base and handled confidentially.  
150 Analyses and results reports will be processed anonymously in groups. Regular patient  
151 journals will be handled confidentially in accordance with The Swedish Patient Data Act.  
152

153 *Regulatory Issues:* Monitor will perform quality controls of the trial according to the  
154 stipulations for confidentiality. The trial will be otherwise carried out in accordance  
155 with trial protocol and GCP (Good Clinical Practice), as well as follow the current law  
156 and regulations that apply. The risk for SUSARs in this trial is minimal.  
157

158  
159

## 160 **Background**

161  
162

### 163 **Breast cancer**

164

165 Breast cancer is the most common form of cancer among women in industrialized  
166 countries and accounts for up to 25% of all cancer types. Approximately 1 in 10 women  
167 will be affected at some point in their lives and in Sweden approximately 7000 women  
168 are affected each year (1). Surgery is the primary treatment for breast cancer and almost  
169 all women with breast cancer undergo surgery and nearly half of those patients will  
170 undergo breast-conserving surgery (2). Mastectomy is performed if the tumor is large, is  
171 multifocal or inflammatory, in the case of recurrence after earlier breast conserving  
172 surgery or after prophylactic breast surgery as may be the case in hereditary breast  
173 cancer (3). Approximately 3000 women undergo mastectomy each year in Sweden.  
174

175

### 176 **Breast Reconstruction**

177

178 There are different methods for reconstructive breast surgery after mastectomy.  
179 Reconstruction may be achieved with implants, that is to say a prosthetic filled with  
180 silicone gel or saline, which is placed under muscle tissue in order to recreate volume  
181 and form. Autologous reconstruction is another option in which one's own body fat  
182 from, for example, the back or abdomen is transitioned to the breast. Occasionally the  
183 methods are combined. Reconstructive breast surgery may be immediate, meaning in  
184 direct connection to mastectomy, or during a later, second surgery known as delayed  
185 reconstruction (1). According to a national questionnaire for women who have  
186 undergone surgery for breast cancer between 1998 and 2003, approximately 20% of  
187 those who underwent mastectomy also received reconstruction and 1/4 of those with  
188 immediate reconstruction. Frequency of breast reconstruction varied, however,  
189 between the different regions (3). Immediate reconstruction is most common in the  
190 regions of Stockholm and Gothenburg where the rate is 19.7% (2009), while the average  
191 for Sweden is 6.1% (2009). Currently there is no data for the number of women who  
192 received delayed reconstruction (2). Karolinska University Hospital performs the most  
193 reconstructive breast surgeries with (an) implant in Sweden and we are known for our  
194 lengthy, well-documented experience and strong tradition of collaboration between  
195 breast and plastic surgeons.  
196

197

### 197 **Prophylactic Antibiotics and Infections**

198

199 Prophylactic antibiotics are administered in connection to certain surgical procedures  
200 with the intention of reducing the risk of a postoperative infection. Infections cause the  
201 patient discomfort or suffering and are costly for the health care system and the  
202 community (4). An infection after reconstructive breast surgery with (an) implant may  
203 incite a long period with infectious symptoms (localized pain, redness, swollen breast  
204 and fever), health status deterioration and lengthy treatments with antibiotics. On  
205 occasion, an infection cannot be remedied with antibiotics and the implant must be  
206 removed and a period of 6 months should pass, without an implant, before the patient  
207 may undergo new reconstructive surgery. An infection can thus bring about great  
208 physical and mental distress for the patient, often leading to long-term sick leave.  
209 Incidence of postoperative infections in connection with reconstructive breast surgery  
210 with (an) implant varies according to the different materials used. Several different  
211 studies report numbers of 6-29% (5, 6, 7, 8, 9). In a national trial for prophylactic  
212 mastectomy among Swedish women who underwent surgery between 1995 and 2005,  
213 removal of prosthetic due to infection affected 10% of the patients (10). The medicinal  
214 advantage of prophylactic antibiotics must be weighed against the risk for side effects of  
215 prophylactics and developing antibiotic resistant bacteria. Antibiotic resistance is  
216 propelled by the total consumption of antibiotics in the community and prophylactic  
217 antibiotics may, when used correctly, reduce the overall necessitation of antibiotics (4).  
218

219 There is scientific evidence showing that prophylactic antibiotics reduce the number of  
220 infections after, for example, colorectal surgery, vascular surgery, heart surgery,  
221 pacemaker implantation, bone fracture surgery, joint prosthetic surgery and breast  
222 cancer surgery. Similar studies are lacking however, as to the value of prophylactic  
223 antibiotics in connection to reconstructive breast surgery with (an) implant.  
224 Staphylococcus aureus is the major pathogen in a postoperative wound and prosthetic  
225 infections and should thereby, based upon empirical evidence, be susceptible to  
226 prophylactics. A single dose of antibiotics can for many surgeries be just as effective as  
227 several doses. In connection with other prosthetic surgeries, such as in orthopedic and  
228 heart surgery, multiple doses of intravenous antibiotics is regular praxis. The effect of  
229 the number of prophylactic doses in connection with reconstructive breast surgery with  
230 (an) implant is not clear (4). In an American retrospective trial of different antibiotic  
231 regimes for breast cancer surgery, including immediate reconstruction with (an)  
232 implant, any difference in frequency of infection could not be proven between patients  
233 who received preoperative prophylactic antibiotics and those who received both pre-  
234 and postoperative prophylactic antibiotics (11). In yet another American retrospective  
235 trial however, in the case of delayed reconstruction with (an) implant among women  
236 who have undergone radiotherapy, the result was prolonged prophylactic antibiotics  
237 with less frequent postoperative infections (12).  
238

## 239 **Objectives and Questions**

240  
241 Where breast cancer surgery is concerned there is scientific evidence that a single dose  
242 of antibiotics as prophylaxis reduces the risk of postoperative infections. As far as  
243 evidence for prophylactic antibiotics within reconstructive breast surgery, the data is  
244 minimal, therein, need for such a trial concerning this matter. In an investigation of  
245 existing literature on this topic performed by The Swedish Agency for Health  
246 Technology Assessment, not a single study could be found specifically for prophylactic  
247 antibiotics in connection with reconstructive breast surgery with (an) implant (4).

248  
249  
250  
251  
252  
253  
254  
255  
256  
257  
258  
259  
260  
261  
262  
263  
264  
265  
266  
267  
268  
269  
270  
271  
272  
273  
274  
275  
276  
277  
278  
279  
280  
281  
282  
283  
284  
285  
286  
287  
288  
289  
290  
291  
292  
293  
294  
295  
296

Currently at Karolinska University Hospital, Solna, prophylactic antibiotics are administered preoperatively as single dose of intravenous Cloxacillin in connection with reconstructive breast surgery with (an) implant. The objective of this trial is to ascertain which regime with intravenous prophylactic antibiotics, single dose or multiple doses, is the most effective as far as complications due to infection or complications with breast reconstruction with (an) implant. Our aim is to optimize prophylaxis and in this way reduce the number of postoperative infections, minimize side effects and the overall consumption of antibiotics.

The questions are:

1. Can changing the current regime of prophylactic antibiotics reduce the number of postoperative infections in breast reconstruction with (an) implant?
2. What is the importance of the length of prophylactic treatment?

## **Method**

### **Participant Sites**

This trial is carried out as a national multicenter trial including five breast and plastic surgery hospitals and departments in Stockholm as well as a number of breast and plastic surgery clinics in the rest of the country that perform implant-based breast reconstruction with (an) implant. For contact information of participating clinics, see attachment 1. At the five participating clinics in Stockholm approximately 300 immediate and delayed implant-based reconstructive breast surgeries are performed each year.

### **Trial Population**

#### ***Inclusion Criteria***

All women (older than 18 years of age) planned to undergo immediate or delayed implant-based first-time reconstruction are asked about participation in this trial. After receiving oral and written information concerning this trial, those women wishing to participate give their written approval in a form of consent.

#### ***Exclusion Criteria***

1. The inability to make a decision based upon the oral and written information about this trial.
2. Allergy to both clinical testing drugs (Cloxacillin and Clindamycin)

### **Trial Arms**

297 The participants are randomized to either of the two trial arms:

298

299 A. Prophylactic antibiotics administered preoperatively as a single intravenous dose  
300 in connection with start of surgery.

301 B. Prophylactic antibiotics administered in multiple doses during the day of surgery  
302 starting preoperatively in connection with start of surgery.

303

### 304 **Randomization**

305

306 Randomizing occurs according to the computer-generated randomization list  
307 ([www.randomization.com](http://www.randomization.com)) with block randomization (18 blocks with 50 patients per  
308 block). Numbered and sealed envelopes that are archived in boxes then handed out to  
309 the participating sites. When a patient is chosen for inclusion, a new envelope is opened  
310 containing information about which of the two trial arms the patient is included in. The  
311 trial is unblinded for both the patients and the personnel responsible for treatment.

312

313 According to completed power calculations, at least 870 patients are included in this  
314 trial with approximately 435 patients in each trial arm. Inclusion time is calculated to 3-  
315 4 years. It is currently difficult to calculate how many patients will be included from the  
316 respective sites.

317

### 318 **Clinical Trial Drugs**

319

320 The clinical trial drugs that are used are antibiotics. First choice antibiotic is Cloxacillin  
321 and second choice antibiotic (in the case of penicillin allergy) is Clindamycin. In trial arm  
322 A, Cloxacillin is given in a dose of 2 g x 1, intravenously, or Clindamycin in a dose of 600  
323 mg x 1, intravenously. In trial arm B Cloxacillin is given in a dose of 2 g x 4,  
324 intravenously, or Clindamycin in a dose of 600 mg x 3, intravenously, evenly spread out  
325 over 24 hours.

326

### 327 **Surgery**

328

329 Surgery is performed under general anesthesia. The implant is either an expander  
330 implant that, after surgery, is gradually filled with saline or is a pre-filled/pre-formed,  
331 permanent implant. All implants have a textured outer layer and an outer capsule of  
332 silicon. The implant will be handled in a standardized manner according to mutual  
333 instructions at participating clinics.

334

### 335 **Outcome Measurements**

336

337 This trial's outcome measurement is a postoperative infection in the reconstructed  
338 breast. In this trial, a postoperative infection is defined as the state/status of the patient  
339 that will incite the treating physician to prescribe treatment with antibiotics. The three  
340 degrees of infection that are registered are:

341

342 1. Infection leading to the removal of an implant (primary endpoint).

343

344 2. Infection requiring intravenous treatment with antibiotics in hospital (secondary  
345 endpoint).

346

347

3. Infection requiring treatment with oral antibiotics (secondary endpoint).

348

349

Furthermore, side effects caused by given prophylactic antibiotics are registered.

350

351

### 352 **Follow-ups**

353

354 Follow-up of patients is carried out 10 days (+/- 3 days), 1 month (+/- 7 days), 3 months

355 (+/-7 days), 6 months (+/- 14 days) and 12 months (+/-14 days) after surgery. These

356 follow-ups are performed by a clinical trials-nurse who collects patient information via

357 patient records and interviews over the telephone.

358

359

### 360 **Handling of Data and Patient Confidentiality**

361

362 Patient information will be collected in a CRF (Case Report Form) that will be stored and

363 locked and only a clinical research nurse will have access to them. The CRF contains

364 patient information such as which type of breast surgery the patient has undergone, if

365 the patient has received chemotherapy and/or radiotherapy, weight, height and BMI as

366 well as information on side effects, postoperative infections, extra doctor's visits or sick

367 leave due to infection. All patient information from this trial will be saved in a

368 registry/database and handled confidentially, only a clinical research nurse and those

369 technicians involved in this trial will have access to this data. All collected data will be

370 saved for five years after the trial is published. Analyses and results reports will be

371 processed anonymously in groups. Regular patient journals will be handled

372 confidentially in accordance with The Swedish Patient Data Act.

373

374 The patient retains the right to, at any time and without further explanation, terminate

375 participation in the trial. If so requested, all trial-related documents and information will

376 be permanently deleted or destroyed. Should the patient choose to terminate

377 participation in this trial, the time and reason, if one is given, for termination will be

378 registered in the CRF and later reported with the results of the trial.

379

380

### 381 **Regulatory Issues**

382

383 Monitor will perform quality controls of the trial according to the stipulations for

384 confidentiality. The trial will be otherwise carried out in accordance with trial protocol

385 and GCP (Good Clinical Practice), as well as follow the current law and regulations that

386 apply. If any changes should occur in the trial plan it will be added into the trial protocol

387 (as an update in the version number) and reported to The Swedish Medical Products

388 Agency.

389

390 Eventual serious incidents are reported through direct contact between the clinical trial

391 investigator and sponsor where each trial unit/hospital is appointed a research nurse

392 who will file the report. These potential incidents will be documented in the database.

393 Furthermore, regular controls of the participants at the follow-ups as well as a review of

394 the participant's journals where eventual incidents are reported to the sponsor by the



395 research nurse responsible for these follow-ups. The risk for SUSARs in this trial is  
396 minimal but should it occur, will be reported in EMA's database (London) in a specific  
397 form provided by KTA (Karolinska Trial Alliance).

398

399

#### 400 **Financing**

401

402 This trial will mainly be carried out within the framework of clinical work done at the  
403 participating clinics. For costs outside of these, financing will be provided by ALF  
404 Medicine, project funding via the Clinic for Reconstructive Plastic Surgery, Karolinska  
405 University Hospital, Solna (ALF-representative Marie Wickman-Chantereau,  
406 M.D./Division Manager/Professor, +468 517 700 00.

407

408

#### 409 **Statistics**

410

411 The difference in the proportion of patients in the comparison groups who develop  
412 infections or don't, will be counted, as well as will the equivalency of the 2-sided, 95%  
413 confidence interval. This trial analyses in the same manner as a superiority trial where  
414 trial medications are expected to be superior to the comparison group's medication with  
415 the occurrence of infection as the focus. The difference between the two comparison  
416 groups will be analyzed with a T-test or a Mann-Whitney-test. The Chi2-test will be used  
417 to calculate categorical variables as long as the number of patients in each cell is at least  
418 five. In the case of fewer patients, Fisher's exact test will be used. Our primary analysis  
419 strategy is "intention to treat", that is to say all patients randomized to their respective  
420 intervention will be included in the group they were randomized to no matter which  
421 treatment they later receive. One per-protocol analysis will also be performed as a  
422 sensitivity test, that is to say, the result will be analyzed according to which treatment  
423 the patients actually received without regard to randomization. This is however a  
424 secondary test compared to the "intention to treat". In the case of dropout after  
425 randomization, the patients will be included in the group they were initially randomized  
426 to.

427

428

#### 429 **Publication**

430

431 Trial results will be presented via one or several articles published in appropriate peer-  
432 reviewed scientific journals. Keeping in mind the number of patients that will be  
433 included and the follow-up time, this publication will most likely take place about five  
434 years after initiation of the trial. The article or articles will even be included in  
435 postgraduate doctoral thesis/dissertation.

436

437

#### 438 **Ethical Questions**

439

440 In this trial there is no placebo control group. The thought of including a group of  
441 patients without prophylactic antibiotics at the time of implantation of, for example a  
442 pacemaker, which is a type of surgery known as having an equally prevalent risk for  
443 infection as reconstructive breast surgery with (an) implant and where previous studies

444 have shown that prophylactic antibiotics are of significant value, can be seen as  
445 unethical.

446

447 Other ethical questions that arise are:

448

449 • If daily prophylactic antibiotics are more effective than a preoperative dose to  
450 avoid complications from infection, are we subjecting those patients who receive  
451 single dose prophylaxis to an increased risk of infection?

452

453 • Are we subjecting patients who receive multiple doses of prophylaxis for  
454 unnecessary amounts of antibiotics and with increased side effects as a result?

455

456

### 457 **Significance**

458

459 As of today, the scientific evidence is insufficient for assessing the value of prophylactic  
460 antibiotics in connection with reconstructive breast surgery with (an) implant, which is  
461 why there is a need for a trial to increase our knowledge on this subject. Should we,  
462 through this trial, succeed in deducing which prophylactic antibiotic regime is the most  
463 effective as far as risk for infection and side effects in connection with reconstructive  
464 breast surgery with (an) implant are concerned, then the risk for postoperative  
465 infections and re-operations could be reduced and therein even the patient's suffering  
466 and discomfort would diminish. A prospective, randomized trial in this regard would  
467 therefore fulfill an important function in the field of reconstructive breast surgery.

468

469

### 470 **References**

471

472

473

474

475

476

477

478 Date and location: ....

479

480 Sponsor's signature: ....

481

482 Sponsor's name printed: .....

483

484

485

486

487

488

489

490
