# Supplementary material for: Effectiveness of Single vs Multiple Doses of Prophylactic Intravenous Antibiotics in Implant-Based Breast Reconstruction: A Randomized Clinical Trial
Source: PubMed Central journal article supplement (PMC9482055; doi:10.1001/jamanetworkopen.2022.31583), 2022-09-16
Supplement: jamanetwopen-e2231583-s002.pdf [file jamanetwopen-e2231583-s002.pdf]

## Supplemental Online Content

Gahm J, Ljung Konstantinidou A, Lagergren J, et al. Effectiveness of single vs multiple doses of prophylactic intravenous antibiotics in implant-based breast reconstruction: a randomized clinical trial. *JAMA Netw Open*. 2022;5(9):e2231583.  
doi:10.1001/jamanetworkopen.2022.31583

**eTable.** Outcome at 6-Month Follow-up for Per-Protocol Analysis, According to Randomization (n = 647)

This supplemental material has been provided by the authors to give readers additional information about their work.

**eTable. Outcome at 6-Month Follow-up for Per-Protocol Analysis, According to Randomization (n = 647)**

| Outcome                              | Single-dose (%)<br>N=321 | Multiple-dose (%)<br>N=326 | Odds-ratio <sup>a</sup><br>(95% confidence interval) | p-value |
|--------------------------------------|--------------------------|----------------------------|------------------------------------------------------|---------|
| Implant removal <sup>b</sup>         | 12 (3.7)                 | 16 (4.9)                   | 1.31 (0.61-2.82)                                     | 0.487   |
| Intravenous antibiotics <sup>c</sup> | 18 (5.6)                 | 24 (7.4)                   | 1.30 (0.69-2.45)                                     | 0.413   |
| Oral antibiotics <sup>d</sup>        | 97 (30.2)                | 77 (23.6)                  | 0.71 (0.50-1.02)                                     | 0.063   |
|                                      |                          |                            |                                                      |         |

<sup>a</sup>Multiple-dose versus single-dose.

<sup>b</sup>12 patients (1.9%) with missing outcome data (8/4).

<sup>c</sup>18 patients (2.8%) with missing outcome data (13/5).

<sup>d</sup>18 patients (2.8%) with missing outcome data (8/10).
